# Supplementary material for: Identification of novel Angiogenin (ANG) gene missense variants in German patients with amyotrophic lateral sclerosis
Source: Springer Nature journal article supplement (doi:10.1007/s00415-009-5124-4), 2009-04-10
Supplement: MOESM1 [file 8454820]

*Rattus norvegicus*  
*Mus musculus*  
*Homo sapiens*  
*Bos taurus*  
*Gallus gallus*

10 20 30 40 50 60 70 80 90 100 110 120 130 140 150  
M E M S L R P L L S V F V L G L V S T P S T L A Q D D P R Y T K F L T Q H Y D A K P K G R D A -- R Y C E S M M R R R G L T -- S P C K E V N T F I H G N K G S I K A I C - G A N G S P Y G E N L R I S O S P F O I T T C K H T G G S P R P P C R Y R A S A G F R H V V I A C E N G L P V H F D E S F I S -- L  
M A I S P G P L F L I F V L G L V V I P P T L A Q D D S R Y T K F L T Q H H D A K P K G R D D -- R Y C E R M M K R R S L T -- S P C K D V N T F I H G N K S N I K A I C - G A N G S P Y R E N L R M S K S P F O V I T T C K H T G G S P R P P C Q Y R A S A G F R H V V I A C E N G L P V H F D E S F S -- L  
M V M G L G V L L L V F V L G L G L T P P T L A Q D N S R Y T H F L T Q H Y D A K P Q G R D D -- R Y C E S I M R R R G L T -- S P C K D I N T F I H G N K R S I K A I C E N K N G N P H R E N L R I S K S S F O V I T T C K L H G G S P W P P C Q Y R A T A G F R N V V A C E N G L P V H L D Q S I F R - R P  
M V M V L S P L L L V F I L G I G L T P V A P A Q D D Y R Y I H F L T Q H Y D A K P K G R N D -- E Y C F N M M K N R R L T -- R P C K D R N T F I H G N K N D I K A I C E D R N G Q P Y R G D L R I S K S E E Q I T I C K H K G G S S R P P C R Y G A T E D S R V I M V G C E N G L P V H F D E S F I T P R H  
-- M A M S S L W W T A I L L A L A L - V S M C Y G V P T L Q D F L R T V L F P K T S F P N I A A Y C N V M M V R R G I N V H G R C K S L N T F V H T D P R N L N T L E I N -- Q E N R A - L R I T T Q Q L P V T D C K L I -- R S H E T S L T G N Q F N H R V R V G S W G C L E V H L G T F P -- --

Consensus

M V M S L + P L L L V F V L G L + L T P + T L A Q D D + R Y T + F L T Q H Y D A K P K G R D D -- R Y C E S M M + R R G L T -- S P C K D V N T F I H G N K R + I K A I C E + A N G + P Y R E N L R I S K S P F O V I T T C K H T G G S P R P P C + Y R A + A G F R H V V A C E N G L P V H F D E S F + S - R L

4  
5  
6  
7  
8  
9
